# Supplementary material
Source: HighWire-hosted journal article supplement (https://www.cmajopen.ca/highwire/filestream/88877/field_highwire_adjunct_files/2/open-2022-0025-3-at.pdf)
Supplement: open-2022-0025-3-at.pdf [file open-2022-0025-3-at.pdf]

**Appendix Table 2:** Distribution of age groups of women with type 2 diabetes aged 14-40 prior to the selection of 1 random birth

| Age group (in years) | First Nation with type 2 diabetes<br>n=1218 |                      | All others with type 2 diabetes<br>n=963 |                      |
|----------------------|---------------------------------------------|----------------------|------------------------------------------|----------------------|
|                      | n (%)                                       | Crude rate (95% CI)  | n (%)                                    | Crude rate (95% CI)  |
| 14-19                | 66 (5.4)                                    | 0.071 (0.056, 0.090) | 10 (1)                                   | 0.028 (0.015, 0.051) |
| 20-24                | 215 (17.7)                                  | 0.15 (0.13, 0.18)    | 55 (5.7)                                 | 0.060 (0.046, 0.078) |
| 25-29                | 345 (28.3)                                  | 0.15 (0.14, 0.17)    | 197 (20.5)                               | 0.10 (0.088, 0.12)   |
| 30-34                | 349 (28.7)                                  | 0.10 (0.092, 0.11)   | 382 (39.7)                               | 0.097 (0.088, 0.11)  |
| 35-40                | 243 (20.0)                                  | 0.044 (0.038, 0.049) | 319 (33.1)                               | 0.039 (0.035, 0.044) |

CI, confidence interval
